# Supplementary material for: Implementation of pseudoreceptor-based pharmacophore queries in the prediction of probable protein targets: explorations in the protein structural profile of Zea mays
Source: Royal Society of Chemistry journal article supplement (doi:10.1039/c4mb00058g), 2014-03-20
Supplement: c4mb00058g1.pdf [file c4mb00058g1.pdf]

## **Supplementary File**

### **Implementation of Pseudoreceptor-based Pharmacophore Queries in the Prediction of Probable Protein Targets: Explorations on *Zea mays* Protein Structural Profile**

Sivakumar Prasanth Kumar<sup>1</sup>, Prakash C. Jha<sup>2</sup>, Himanshu A. Pandya<sup>1</sup> & Yogesh T. Jasrai\*<sup>1</sup>

<sup>1</sup>Department of Bioinformatics, Applied Botany Centre (ABC), University School of Sciences, Gujarat University, Navrangpura, Ahmedabad – 380009, Gujarat, India.

<sup>2</sup>School of Chemical Sciences, Central University of Gujarat, Sector-30, Gandhinagar-382030, India

\*Corresponding Author.

Tel: +91 079 26302578; Fax: +91 079 26306194; E-mail: yjasrai@yahoo.com

#### **Supplementary files information**

**Fig. S1** The flowchart of the proposed methodology

**Fig. S2** The binding conformations of co-crystallized and GRIP docking poses of 3 ligands with its experimental proteins illustrating RMSD.

**Fig. S3** The energy plot of common targets complexed with the ligands for the timescale of 2 ns

**Table S1** The evaluative step of selected GRIP poses of the protein target-ligand dataset

**Table S2** List of amino acids available in protein cavities of the *Zea mays* dataset

**Table S3** Distribution of various types of amino acids present in protein cavities of the *Zea mays* dataset

**Table S4** Enrichment factor study of probable protein targets retrieval rate

**Citation details for R1-R15 of Table 7**

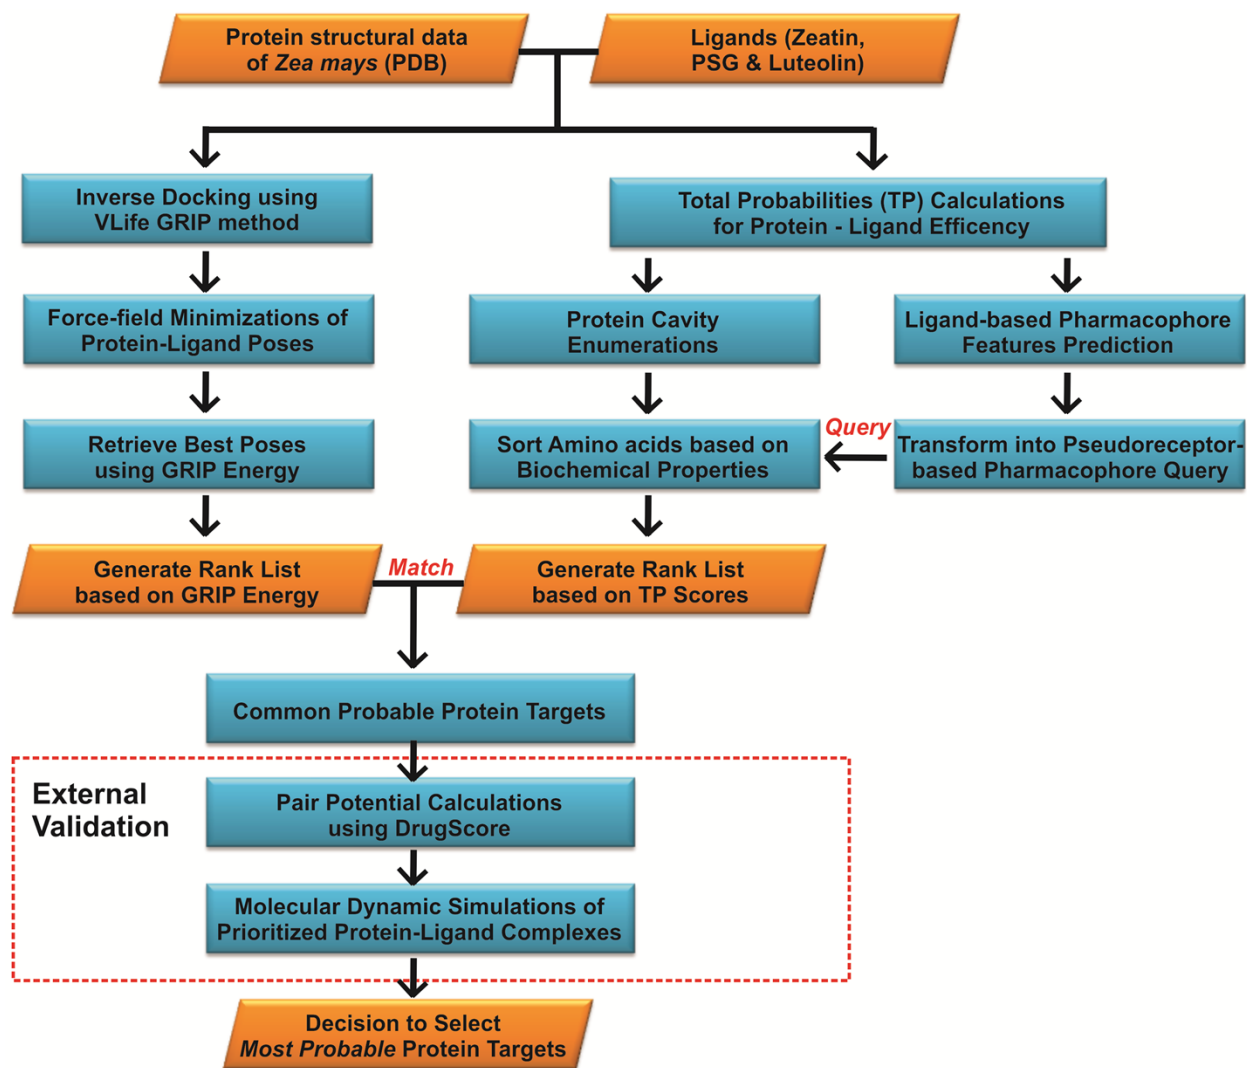

**Fig. S1** The flowchart of the proposed methodology

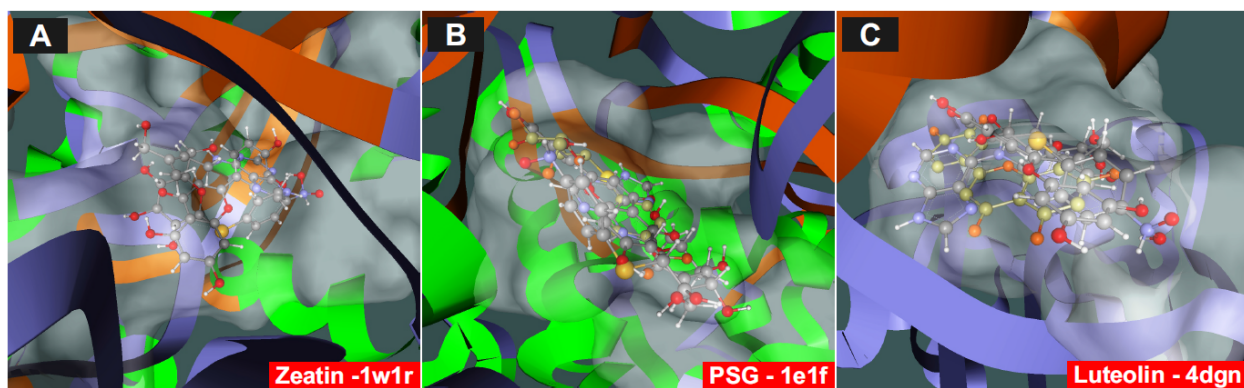

**Fig. S2** The binding conformations of co-crystallized and GRIP docking poses of 3 ligands with its experimental proteins illustrating RMSD.

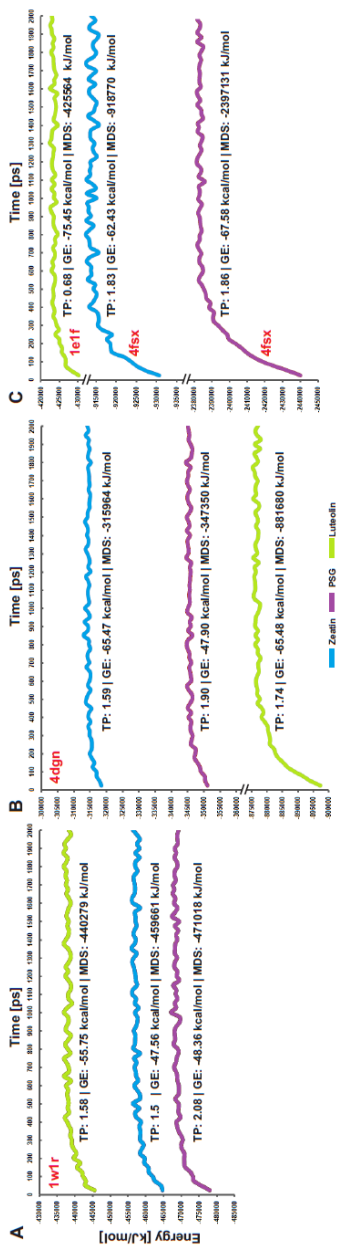

**Fig. S3** The energy plot of common targets complexed with the ligands for the timescale of 2 ns.

**Table S1** The evaluative step of selected GRIP poses of the protein target-ligand dataset

| No. | Protein                                               | PDB<br>ID | GRIP evaluative step |     |          |
|-----|-------------------------------------------------------|-----------|----------------------|-----|----------|
|     |                                                       |           | Zeatin               | PSG | Luteolin |
| 1   | DNA (cytosine-5)-methyltransferase 1                  | 4fsx      | 27                   | 60  | 73       |
| 2   | 4-Hydroxyphenylpyruvate dioxygenase                   | 1sp9      | 71                   | 62  | 74       |
| 3   | Aminoaldehyde dehydrogenase 1                         | 4i8p      | 43                   | 34  | 21       |
| 4   | Beta-expansin 1a                                      | 2hcz      | 46                   | 69  | 16       |
| 5   | Non-symbiotic hemoglobin 1                            | 2r50      | 64                   | 68  | 85       |
| 6   | Zeamatin                                              | 1du5      | 37                   | 16  | 63       |
| 7   | Nonspecific lipid transfer protein                    | 1mzm      | 58                   | 81  | 26       |
| 8   | Chloroplast group II intron splicing factor CRS2      | 1ryb      | 5                    | 18  | 37       |
| 9   | Cytokinin dehydrogenase 1 <sup>a</sup>                | 1w1r      | 12                   | 76  | 6        |
| 10  | Nucleoside N-ribohydrolase 3                          | 4kpo      | 70                   | 96  | 31       |
| 11  | Transketolase                                         | 1itz      | 49                   | 29  | 34       |
| 12  | Glutathione S-transferase I                           | 1axd      | 92                   | 34  | 53       |
| 13  | Bifunctional amylase/serine protease inhibitor        | 1bea      | 74                   | 51  | 1        |
| 14  | BX1 / Chloroplastic indole-3-glycerol phosphate lyase | 1tjr      | 34                   | 33  | 78       |
| 15  | Pyruvate phosphate dikinase                           | 1vbh      | 81                   | 7   | 96       |
| 16  | Histidine-containing phosphotransfer protein          | 1wn0      | 21                   | 6   | 49       |
| 17  | Adenylate kinase                                      | 1zak      | 61                   | 50  | 6        |
| 18  | NADH-dependent nitrate reductase                      | 2cnd      | 12                   | 36  | 40       |
| 19  | Ribosome-inactivating protein 3                       | 2pqj      | 12                   | 51  | 74       |
| 20  | Casein kinase II alpha subunit <sup>a</sup>           | 4dgn      | 87                   | 11  | 66       |
| 21  | Ferredoxin-NADP reductase                             | 3lo8      | 14                   | 21  | 37       |
| 22  | Chloroplast pentatricopeptide repeat protein 10       | 4m59      | 25                   | 89  | 5        |
| 23  | Polyamine oxidase                                     | 1b37      | 41                   | 92  | 69       |
| 24  | Phosphoenolpyruvate carboxylase                       | 1jqo      | 74                   | 95  | 79       |
| 25  | Auxin-binding protein 1                               | 1lrh      | 94                   | 24  | 97       |
| 26  | Beta-glucosidase <sup>a</sup>                         | 1e1f      | 5                    | 65  | 41       |
| 27  | Chloroplastic 9-cis-epoxycarotenoid dioxygenase 1     | 3npe      | 76                   | 63  | 46       |
| 28  | Glutamine synthetase                                  | 2d3a      | 16                   | 8   | 45       |

<sup>a</sup> Experimental protein targets.

**Table S2** List of amino acids available in protein cavities of the *Zea mays* dataset

| No. | PDB code | Type of protein structure <sup>a</sup> | Amino acids                                                                                                                                                                                                                                                                                                                                                                                                                                                                                                                                                                                                                                                                                             | Total |
|-----|----------|----------------------------------------|---------------------------------------------------------------------------------------------------------------------------------------------------------------------------------------------------------------------------------------------------------------------------------------------------------------------------------------------------------------------------------------------------------------------------------------------------------------------------------------------------------------------------------------------------------------------------------------------------------------------------------------------------------------------------------------------------------|-------|
| 1   | 4fsx     | K                                      | Tyr347A, Ser348A, Gly349A, Cys350A, Gly351A, Gly352A, Val374A, Asp375A, Phe376A, Asn377A, Ala380A, Glu396A, Lys397A, Ala398A, Asp399A, Gly514A, Pro516A, Gln540A, Glu559A, Asn851A, Ala852A, Val853A                                                                                                                                                                                                                                                                                                                                                                                                                                                                                                    | 22    |
| 2   | 1sp9     | P                                      | His226B, Val228B, Glu252B, Ser263B, Leu265B, Asn266B, Ser267B, Ala268B, Val269B, Pro280B, Ile281B, Asn282B, Gln307B, His308B, Ile160A, Thr161A, Pro162A, Trp163A, Asn164A, Met169A, Trp172A, Lys187A, Pro188A, Ser189A, Glu190A, Gly218A, Leu219A, Gly220A, Pro221A, Gly224A, Ala225A, Ser228A, Phe238A, Thr239A, Gly240A, Ser241A, Phe242A, Thr244A, Lys247A, Ile248A, Glu262A, Leu263A, Gly264A, Gly265A, Cys296A, Glu395A, Phe397A, Leu423A, Trp461A, Ser467A, Glu472A                                                                                                                                                                                                                               | 14    |
| 3   | 4i8p     | K                                      | Arg139X, Cys140X, Lys141X, Tyr142X, Pro143X, Ala144X, Gly145X, Gln146X, Lys147X, Ala169X, Asp170X, Phe40A, Val43A, Ala50A, Met53A, Phe54A, Lys69A, His73A, Ser76A, Val77A, Met80A, Thr99A, Arg103A, Leu104A, Thr107A, His108A, Tyr111A, Val113A, His117A, Phe118A, Thr121A, Tyr150A, Leu153A, Val154A, Ile157A                                                                                                                                                                                                                                                                                                                                                                                          | 37    |
| 4   | 2hcz     | P                                      | Ala42B, Ala43B, Arg44B, Tyr75B, Glu84B, Tyr85B, Ala86B, Phe95B, Phe96B, Asp97B                                                                                                                                                                                                                                                                                                                                                                                                                                                                                                                                                                                                                          | 11    |
| 5   | 2r50     | K                                      | Ile11A, Cys14A, Ile15A, Ala18A, Val33A, Leu36A, Asn37A, Ala40A, Arg46A, Ala49A, Leu53A, Ala56A, Ala57A, Val60A, Ala68A, Ile71A, Pro72A, Val77A, Ile79A, Pro80A, Tyr81A, Ile83A, Val92A                                                                                                                                                                                                                                                                                                                                                                                                                                                                                                                  | 24    |
| 6   | 1du5     | P                                      | Leu102A, Arg103A, Leu104A, Gln105A, Lys106A, Lys107A, Gly108A, Asp169A, Ile184A, Val378A, Glu381A, Trp391A, Trp397A, Asn399A, Pro427A, Ile429A, Tyr431A, Ser456A, Leu458A, Tyr491A, Leu492A, Asp8A, Asp12A, Asp13A, Asn37A, Ala77A, Phe79A, Val80A, His81A, Leu123A, Gly124A, Leu149A, Ala156A, Gly157A, Asn158A, Ala159A, Pro161A, Glu164A, Ala165A, Asn166A, Leu189A, Thr193A, Tyr223A, Trp226A, His227A, Tyr231A, Phe237A, His239A, Asp240A, Leu41A, Ala76A, His78A, Gly127A, Pro128A, Leu129A, Gly167A, Asp168A, Gly169A, Cys170A, Glu173A, Asp196A, Asn198A, Ile200A, Ser201A, Ile202A, Ile261A, His275A, Ala391B, Asp392B, Leu393B, Val421B, Glu423B, Thr446B, Phe447B, Phe450B, Tyr453B, His486B | 10    |
| 7   | 1mzm     | K                                      | Asn13A, Arg16A, Gln53A, Val54A, Pro55A, Glu66A, Ser67A, Arg68A, Glu100B, Asn104B                                                                                                                                                                                                                                                                                                                                                                                                                                                                                                                                                                                                                        | 23    |
| 8   | 1ryb     | P                                      | Pro13A, His14A, Asn15A, Pro16A, Leu17A, Pro18A, Arg46A, Glu47A, Leu48A, Asp50A, Ile51A                                                                                                                                                                                                                                                                                                                                                                                                                                                                                                                                                                                                                  | 7     |
| 9   | 1wlr     | K                                      | Tyr107A, Thr109A, Glu134A, Gly136A, Val137A, Pro138A, Cys139A, Pro142A, Ile144A, Asp145A, Ile149A, Val153A, Leu184A, Ser185A, Tyr186A, Ile207A, Pro209A, Leu233A, Tyr255A, Val257A, Thr263A, Gly264A, Pro265A, Gly291A, Phe292A, Gly293A, Ile294A, Ser295A, Ile312A, Ile313A, Gly314A, Ser315A, Ala316A                                                                                                                                                                                                                                                                                                                                                                                                 | 14    |
| 10  | 4kpo     | P                                      | Leu562A, Arg564A, Glu566A, Arg621A, Asp624A, Arg671A, Met748A, Glu750A, Phe770A, Gly771A, Thr772A, Asn773A, Asp774A, Cys836A, Gly837A                                                                                                                                                                                                                                                                                                                                                                                                                                                                                                                                                                   | 28    |
| 11  | 1itz     | K                                      | Glu25A, Gln26A, Gln28A, Gln29A, Met32A, Glu8C, Gln9C, Asn11C, Ala12C, Ala19D, Ser20D, Gly21D                                                                                                                                                                                                                                                                                                                                                                                                                                                                                                                                                                                                            | 28    |
| 12  | 1axd     | K                                      | Ala13A, Pro14A, Ala15A, Ser16A, Gly17A, Lys18A, Gly19A, Thr20A, Gln21A, Ala36A, Gly37A, Leu40A, Arg41A, Phe57A, Met58A, Gly61A,                                                                                                                                                                                                                                                                                                                                                                                                                                                                                                                                                                         | 10    |
| 13  | 1bea     | P                                      |                                                                                                                                                                                                                                                                                                                                                                                                                                                                                                                                                                                                                                                                                                         | 11    |
| 14  | 1tjr     | P                                      |                                                                                                                                                                                                                                                                                                                                                                                                                                                                                                                                                                                                                                                                                                         | 33    |
| 15  | 1vbh     | K                                      |                                                                                                                                                                                                                                                                                                                                                                                                                                                                                                                                                                                                                                                                                                         | 15    |
| 16  | 1wn0     | P                                      |                                                                                                                                                                                                                                                                                                                                                                                                                                                                                                                                                                                                                                                                                                         | 12    |
| 17  | 1zak     | K                                      |                                                                                                                                                                                                                                                                                                                                                                                                                                                                                                                                                                                                                                                                                                         | 42    |

|    |      |   |                                                                                                                                                                                                                                                                                                                                                                            |    |
|----|------|---|----------------------------------------------------------------------------------------------------------------------------------------------------------------------------------------------------------------------------------------------------------------------------------------------------------------------------------------------------------------------------|----|
|    |      |   | Gln62A,Leu63A,Val64A,Val69A,Gly91A,Tyr92A,Pro93A,Arg94A,<br>Gln98A,Arg125A,Val126A,Gly128A,Arg129A,Ile138A,Tyr139A,<br>His140A,Tyr143A,Ser144A,Arg158A,Asp160A,Arg169A,Gly193A,<br>Ala195A,Thr196A,Val197A,Val200A                                                                                                                                                         |    |
| 18 | 2cnd | K | His48A,Cys60A,Arg62A,Ala63A,Tyr64A,Thr65A,Leu79A,Val80A,<br>Lys81A,Tyr83A,Phe84A,Glu87A,His88A,Phe91A,Gly94A,Gly95A,<br>Leu96A,Met97A,Thr98A,Gln99A,Ser146A,Thr149A,Pro150A,<br>Cys242A,Phe270A                                                                                                                                                                            | 25 |
| 19 | 2pqj | K | Leu93A,Tyr94A,Leu95A,Phe108A,Gly128A,Arg129A,Tyr130A,<br>Val202A,Cys206A,Glu207A,Arg210A                                                                                                                                                                                                                                                                                   | 11 |
| 20 | 4dgn | K | Val45A,Gly46A,Ser51A,Val53A,Ile66A,Lys68A,Glu81A,Val95A,<br>Phe113A,Glu114A,Tyr115A,Val116A,Asn117A,Asn118A,Met163A,<br>Ile174A,Asp175A,Trp176A                                                                                                                                                                                                                            | 18 |
| 21 | 3lo8 | K | Ser71A,Arg91A,Leu92A,Tyr93A,Ser94A,Cys112A,Val113A,Arg114A,<br>Ala116A,Val117A,Tyr118A,Ser129A,Lys130A,Asn131A,Gly132A,<br>Val133A,Cys134A,Ser135A,Asn136A,Thr175A,Ala178A,Glu314A,<br>Tyr316A                                                                                                                                                                             | 23 |
| 22 | 4m59 | P | Tyr219A,Gly220A,Arg221A,Met222A,Gly223A,Arg224A,Ser225A,<br>Trp226A,Pro227A,Ile229A,Ala254A,Cys255A,Arg257A,Asp258A,<br>Leu260A                                                                                                                                                                                                                                            | 15 |
| 23 | 1b37 | K | Val10A,Gly11A,Ala12A,Gly13A,Met14A,Ser15A,Gly16A,Leu34A,<br>Glu35A,Ala36A,Thr37A,Gly41A,Gly42A,Arg43A,Met44A,Leu56A,<br>Gly57A,Ala58A,Asn59A,Trp60A,Glu62A,Tyr205A,Lys235A,<br>Val236A,Val237A,Ser265A,Ala266A,Ser267A,Val270A,Leu275A,<br>Ile276A,Tyr298A,Lys300A,Trp393A,Phe398A,Tyr399A,Thr402A,<br>Phe403A,Gly429A,Glu430A,Gly438A,Tyr439A,Val440A,His441A,<br>Ala443A | 45 |
| 24 | 1jqo | P | Tyr601B,Arg610B,Ala613B,Ala614B,Trp615B,Leu617B,Tyr618B,<br>Gln621B,Arg641B,Val645B,Gly646B,Gly648B,Gly649B,Gly650B,<br>Pro651B,Leu654B,Ala655B,Ser658B,Gln659B,Pro660B,Val790B,<br>Phe821B,Val824B,Thr825B,Leu826B,Leu828B,Leu829B,Val832B                                                                                                                                | 28 |
| 25 | 1lrh | K | Leu68A,Gln94A,Asn95A,Ile12D,Ser13D,Gln17D,Ile28D,Leu45D,<br>Lys69D,Gln118D                                                                                                                                                                                                                                                                                                 | 10 |
| 26 | 1e1f | K | Ser35A,Gln38A,His142A,Trp143A,Asn190A,Glu191A,Thr194A,<br>Phe198A,Phe205A,Met263A,Asn331A,Tyr333A,Trp378A,Glu406A,<br>Trp457A,Ser458A,Asn462A,Glu464A,Trp465A,Phe466A,Tyr473A                                                                                                                                                                                              | 21 |
| 27 | 3npe | K | Glu132A,Arg133A,Pro134A,Pro135A,Arg193A,Asp276A,Asp278A                                                                                                                                                                                                                                                                                                                    | 7  |
| 28 | 2d3a | K | Glu129A,Glu131A,Tyr158A,Asn190A,Glu192A,Val193A,Gln197A,<br>Glu199A,Asn244A,Gly245A,Ala246A,Gly247A,His249A,Arg291A,<br>His296A,Glu297A,Thr298A,Arg311A,Arg316A,Glu330A,Arg332A,<br>Asp56B,Ser59B                                                                                                                                                                          | 23 |

<sup>a</sup> K –Known binding site P-Predicted binding site

**Table S3** Distribution of various types of amino acids present in protein cavities of the *Zea mays* dataset

| Proteins | Type of amino acid        |                          |                                     |     |     |                        |
|----------|---------------------------|--------------------------|-------------------------------------|-----|-----|------------------------|
|          | Negative charged (Acidic) | Positive charged (Basic) | Amino acid with aromatic side chain | HBA | HBD | HBA/HBD (pH dependent) |
| 4fsx     | 4                         | 1                        | 2                                   | 4   | 1   | 5                      |
| 1sp9     | 1                         | 2                        | 2                                   | 1   | 0   | 7                      |
| 4i8p     | 4                         | 2                        | 6                                   | 4   | 5   | 8                      |
| 2hcz     | 1                         | 3                        | 1                                   | 1   | 3   | 2                      |
| 2r50     | 0                         | 5                        | 8                                   | 0   | 2   | 9                      |
| 1du5     | 2                         | 1                        | 4                                   | 2   | 1   | 2                      |
| 1mzm     | 0                         | 1                        | 1                                   | 0   | 1   | 2                      |
| 1ryb     | 0                         | 3                        | 0                                   | 0   | 3   | 1                      |
| 1w1r     | 2                         | 0                        | 4                                   | 2   | 2   | 4                      |
| 4kpo     | 5                         | 3                        | 8                                   | 5   | 1   | 9                      |
| 1itz     | 5                         | 3                        | 6                                   | 5   | 0   | 7                      |
| 1axd     | 2                         | 2                        | 0                                   | 2   | 2   | 4                      |
| 1bea     | 2                         | 2                        | 1                                   | 2   | 1   | 2                      |
| 1tjr     | 2                         | 0                        | 4                                   | 2   | 0   | 8                      |
| 1vbh     | 4                         | 3                        | 1                                   | 4   | 3   | 2                      |
| 1wn0     | 2                         | 0                        | 0                                   | 2   | 0   | 6                      |
| 1zak     | 1                         | 8                        | 5                                   | 1   | 7   | 11                     |
| 2cnd     | 1                         | 4                        | 7                                   | 1   | 2   | 9                      |
| 2pqj     | 1                         | 2                        | 3                                   | 1   | 2   | 2                      |
| 4dgn     | 3                         | 1                        | 3                                   | 3   | 2   | 4                      |
| 3lo8     | 1                         | 3                        | 3                                   | 1   | 3   | 10                     |
| 4m59     | 1                         | 3                        | 2                                   | 1   | 4   | 2                      |
| 1b37     | 3                         | 4                        | 9                                   | 3   | 5   | 11                     |
| 1jqo     | 0                         | 2                        | 4                                   | 0   | 3   | 6                      |
| 1lrh     | 0                         | 1                        | 0                                   | 0   | 1   | 5                      |
| 1e1f     | 3                         | 1                        | 10                                  | 3   | 4   | 10                     |
| 3npe     | 3                         | 2                        | 0                                   | 3   | 2   | 0                      |
| 2d3a     | 7                         | 6                        | 3                                   | 7   | 4   | 8                      |



**Table S4** Enrichment factor study of probable protein targets retrieval rate

| Statistic                              | Zeatin  | PSG    | Luteolin |
|----------------------------------------|---------|--------|----------|
| Database molecules (D)                 | 28      | 28     | 28       |
| Actives (A)                            | 6       | 11     | 3        |
| Total hits (Ht)                        | 19      | 20     | 17       |
| Active hits (Ha)                       | 1       | 1      | 1        |
| % Yield of actives [(Ha/Ht)*100]       | 5.2631  | 5      | 5.8823   |
| % Ratio of actives [(Ha/A)*100]        | 16.6667 | 9.0909 | 33.3333  |
| Enrichment factor (EF) [(Ha*D)/(Ht*A)] | 0.2456  | 0.1273 | 0.5490   |

**Citation details for R1-R15 of Table 7**

R1. I. Frébort, M. Kowalska, T. Hluska, J. Frébortová and P. Galuszka, *J. Exp. Bot.*, 2011, **62**, 2431-2452.

R2. B. Sugiharto, J. N. Burnell and T. Sugiyama, *Plant Physiol.*, 1992, **100**, 153-156.

R3. J. Veselý, L. Havlicek, M. Strnad, J. J. Blow, A. Donella-Deana, L. Pinna, D. S. Letham, J. Kato, L. Detivaud, S. Leclerc and L. Meijer, *Eur. J. Biochem.*, 1994, **224**, 771-786.

R4. M. E. Maffei, G. Arimura and A. Mithöfer, 2012. *Nat. Prod. Rep.*, 2012, **29**, 1288-1303.

R5. B. Gillissen, L. Bürkle, B. André, C. Kühn, D. Rentsch, B. Brandl and W. B. Frommer, *Plant Cell*, 2000, **12**, 291-300.

R6. K. M. Schnorr, C. Gaillard, E. Biget, P. Nygaard and M. Laloue, *Plant J.*, 1996, **9**, 891-898.

R7. L. Hecquet, J. Bolte and C. Demuyneck, *Tetrahedron*, 1994, **50**, 8677-8684.

R8. Chemical similarity searching using similarity ensemble approach (SEA). ADK\_TOXGO\_10000 with e value = 2.03 e-26 and MaxTC =0.31, Calculated 15 January 2014, <http://sea.bkslab.org/>

R9. J. Du, X. Zhong, Y. V. Bernatavichute, H. Stroud, S. Feng, E. Caro, A. A. Vashisht, J. Terragni, H. G. Chin, A. Tu, J. Hetzel, J. A. Wohlschlegel, S. Pradhan, D. J. Patel and S. E. Jacobsen, *Cell*, 2012, **151**, 167-80.

R10. P. Hidalgo, V. Garretón, C. G. Berríos, H. Ojeda, X. Jordana and L. Holuigue, *Plant Physiol.*, 2001, **125**, 396-405.

R11. W. Peters, B. Füchtbauer and E. Beck, *J. Plant Physiol.*, 1995, **147**, 401-407.

R12. T. Filipi, P. Mazura, L. Janda, N. S. Kiran and B. Brzobohatý, *Phytochemistry*, 2012, **74**, 40-48.

R13. G. R. Moran, *Arch. Biochem. Biophysics*, 2005, **433**, 117–128.

R14. A. Weinhold, K. Shaker, M. Wenzler, B. Schneider and I. T. Baldwin, *J. Chem. Ecol.*, 2011, **37**, 1091-1098.

R15. J. Frébortová, M. W. Fraaije, P. Galuszka, M. Sebel, P. Pec, J. Hrbác, O. Novák, K. D. Bilyeu, J. T. English and I. Frébort, *Biochem. J.*, 2004, **380(Pt 1)**, 121-130.
